# Supplementary material for: Treatment of the terrible triad of the elbow by olecranon osteotomy: a retrospective cohort study
Source: PeerJ. 2024 Nov 15;12:e18469. doi: 10.7717/peerj.18469 (PMC11572344; doi:10.7717/peerj.18469)
Supplement: Data S1 [file peerj-12-18469-s001.xlsx]

## Sheet: row data
No	year	Sex	Causes of injury	Left or right side	Mason	Morrey	Time to operation (d)	Follow-up (months)	Fracture healing time (months)	Flexion	Extension	ROM of flexion and extension	Pronation	Supination	ROM of rotation	MEPS	Complications	VAS_pre	VAS_follow	PCS_pre	MCS_pre	PCS_follow	MCS_follow
1	30	1	3	2	2	1	6	37	5	120	15	105	75	85	160	80	0	9	1	46.25	54	92.5	96.5
2	21	1	1	2	2	1	4	18	6	130	10	120	80	75	155	83	0	10	1	43	62.575	95.25	96.75
3	31	0	1	2	3	2	3	18	5	120	15	105	80	70	150	85	0	7	1	51.75	59.825	90.5	96.5
4	56	0	1	2	2	1	4	55	5	130	5	125	70	70	140	80	0	10	0	53	51.75	91.25	94.25
5	55	1	3	2	1	1	6	43	3	130	0	130	85	80	165	95	0	9	0	46.5	60.325	96	88.65
6	23	1	1	1	2	2	3	17	3	120	15	105	75	85	160	90	0	9	2	45.5	63.575	97.75	97.75
7	58	1	2	2	2	1	4	52	6	125	10	115	80	75	155	80	0	8	2	44.25	67.075	93.5	98.75
8	52	1	2	1	3	1	5	39	4	110	20	90	75	80	155	83	1	10	2	43	51.5	87.5	96.5
9	18	1	2	2	2	2	4	60	4	130	20	110	80	70	150	96	0	8	0	44.25	62.575	93	96.75
10	19	0	2	1	2	1	3	48	6	135	0	135	80	75	155	89	0	10	2	44.75	59.825	93	96.5
11	58	1	1	1	2	1	8	29	6	120	0	120	80	85	165	96	0	10	2	50.5	62.075	98	98.75
12	49	1	2	1	3	2	3	51	6	140	15	125	75	85	160	89	0	7	0	48	69.65	94.75	95.5
13	52	0	1	1	2	1	5	17	3	115	10	105	80	85	165	81	0	7	0	43.75	59.825	94.75	99
14	68	0	3	2	1	1	7	32	4	115	20	95	70	75	145	80	1	10	1	53.75	56.325	90	84.65
15	39	0	3	1	2	2	8	58	4	120	15	105	75	90	165	88	0	10	1	37.5	61.075	92.5	97.75
16	40	1	2	1	2	1	7	44	4	110	5	105	75	75	150	80	0	9	1	46.5	66.075	96	97.75
17	30	0	2	2	3	1	4	57	4	120	10	110	70	75	145	99	0	8	1	45.5	57.5	91.25	100
18	18	0	1	2	2	2	4	29	5	125	15	110	85	80	165	92	0	8	1	47.25	57.325	86.75	96.5
19	41	1	2	1	2	1	3	23	6	125	20	105	70	90	160	86	1	7	1	39.25	61.075	94.75	97.75
20	22	0	1	1	3	1	5	58	6	130	15	115	80	75	155	82	0	9	2	43.75	58.825	95	95.5
21	65	1	3	1	2	2	7	41	3	110	0	110	80	75	155	96	0	8	0	50.5	62.575	95.5	96.75
22	19	1	1	2	1	1	7	35	5	140	15	125	80	85	165	90	0	8	2	52.25	64.825	95.5	99
23	38	1	1	2	2	1	4	32	4	135	0	135	85	70	155	81	0	10	0	45.5	60.075	92.25	88.4
24	33	0	3	1	3	2	8	20	3	115	5	110	75	70	145	90	0	9	0	45	58.825	96	95.5
25	26	1	3	2	2	1	6	15	4	120	0	120	80	70	150	88	0	7	0	39.25	58.575	94.25	97.75
26	28	0	2	1	2	1	6	33	3	110	10	100	85	75	160	84	0	7	0	51.75	63.575	95	95.25
27	64	1	2	1	3	2	8	55	4	120	5	115	80	85	165	95	1	7	0	54	58.825	96	95.5
28	33	0	1	1	1	1	6	35	5	140	0	140	80	80	160	95	0	9	2	45.5	60.075	88	96.75
29	28	0	3	1	2	1	6	44	5	135	5	130	80	85	165	100	0	10	0	48.25	55	94.25	97.5
30	24	0	3	1	2	2	5	44	5	120	0	120	70	75	145	100	0	9	2	44.25	62.325	96.25	96.5
31	53	1	3	1	3	1	7	35	4	125	5	120	80	80	160	100	1	10	0	53	59.825	89.75	94
32	37	0	1	2	2	1	8	23	3	140	0	140	85	85	170	98	0	9	2	43	58.325	93.5	89.15
33	34	1	3	2	2	2	7	41	3	140	10	130	85	85	170	97	0	8	2	43.5	61.075	93	97.75
34	20	0	3	1	1	1	6	29	3	120	15	105	70	70	140	87	1	8	0	45	62.325	93.75	96.5
35	42	0	2	2	2	1	8	38	4	115	5	110	80	85	165	81	0	10	1	41.75	51.75	96.5	96.75
36	65	1	1	2	3	2	6	30	5	140	15	125	80	75	155	95	0	7	2	45	63.825	95	98
37	43	1	1	1	2	1	5	47	6	115	15	100	85	90	175	91	0	10	2	43	63.575	93.75	97.75
38	66	1	1	1	2	1	4	25	6	120	15	105	70	90	160	96	0	8	1	44.75	58.825	91.75	95.5
39	27	0	3	2	3	2	5	20	5	125	20	105	75	80	155	96	1	10	0	48.25	60.075	99.25	88.4
40	62	0	2	1	1	1	5	15	3	135	20	115	80	85	165	85	0	10	2	45.5	69.4	94.75	97.75
41	51	0	2	2	2	1	5	16	4	120	15	105	85	90	175	83	0	9	1	45	62.325	96	96.5
42	39	0	1	1	3	2	8	53	4	140	15	125	80	80	160	83	1	7	2	44	64.575	93.75	87.9
43	31	1	3	1	2	1	4	52	4	125	10	115	75	80	155	95	0	8	1	45.5	59.825	93	96.5
44	31	0	3	1	2	1	5	43	5	140	5	135	75	85	160	99	0	7	2	46.75	57.325	90.25	96.5
45	63	1	1	2	1	2	7	35	6	130	0	130	70	80	150	88	0	10	0	50.5	60.075	93.75	96.75
46	19	1	3	2	3	1	7	60	3	120	0	120	80	80	160	95	1	8	2	46.75	62.575	94.25	96.75
47	51	1	3	1	2	1	6	15	3	115	10	105	70	75	145	85	0	9	1	45.5	59.825	96	96.5
48	64	1	3	2	2	2	6	32	3	115	15	100	80	85	165	86	0	10	1	44.25	60.075	88	96.75
49	57	1	1	1	3	1	3	29	4	120	5	115	80	70	150	82	0	9	2	45.5	61.325	92.5	95.5
50	36	0	2	2	2	1	3	53	3	120	5	115	75	70	145	86	1	10	2	43.25	55.25	99.25	95.25
51	40	0	2	1	2	2	3	51	6	140	5	135	80	80	160	93	0	10	1	48	59.825	96	96.5
52	55	1	2	2	3	1	6	35	3	120	15	105	70	75	145	81	0	10	0	46	57.325	95.5	88.15
53	57	0	3	1	1	1	7	20	4	120	10	110	80	90	170	91	0	8	1	45.5	62.075	93	98.75
54	48	0	1	2	2	2	6	31	3	115	0	115	75	70	145	95	1	9	0	45.5	71.9	95	97.75
55	28	1	1	2	3	1	7	22	4	115	20	95	70	70	140	95	1	7	0	45.5	59.825	96	96.5
56	46	1	1	2	2	1	5	34	4	120	15	105	80	75	155	96	0	9	1	38	62.575	95.25	94.25
57	48	1	3	1	2	2	7	38	5	125	5	120	70	80	150	87	0	9	0	45	60.075	93.75	96.75
58	45	0	2	1	1	1	8	28	6	130	10	120	80	70	150	80	0	9	1	44.75	61.075	95.5	97.75
59	62	1	2	2	3	1	6	30	6	120	15	105	80	90	170	99	0	10	2	47.25	69.65	90.25	95.5
60	34	0	3	1	2	3	5	54	5	135	5	130	75	85	160	81	0	8	0	48.25	62.575	94.25	96.75
61	26	1	2	2	3	1	7	53	3	125	10	115	75	70	145	90	1	10	1	46.25	59.825	91.25	96.5
62	29	1	3	1	2	2	4	41	4	120	15	105	70	85	155	92	0	10	2	43	58.575	93.5	97.75
63	21	1	1	2	2	1	8	60	5	130	5	125	75	90	165	93	0	10	0	52.5	59.825	93.75	96.5
64	22	1	2	2	3	3	7	35	4	140	0	140	80	80	160	85	0	7	1	41	64.575	94	96.25
65	26	1	2	2	2	2	8	56	4	120	10	110	70	80	150	93	1	9	0	46.5	59.825	97.25	96.5
66	21	0	2	2	1	1	5	27	5	135	15	120	80	75	155	85	0	9	1	43	62.325	95.25	96.5
67	65	1	3	1	2	3	8	35	3	115	15	100	75	75	150	95	0	9	2	45.5	62.575	93.75	96.75
68	36	1	3	2	2	2	7	41	4	115	10	105	75	85	160	85	0	10	0	48.25	51.75	86.75	96.75
69	30	1	2	2	3	1	6	49	3	120	5	115	80	80	160	80	1	9	0	47.5	59.825	94.75	96.5
70	50	1	2	1	2	3	6	35	3	110	5	105	85	75	160	86	0	8	0	37.25	62.575	95.5	85.9
71	45	1	1	2	2	2	3	53	3	140	20	120	75	85	160	91	0	10	1	42.5	62.575	93.5	96.75
72	40	1	1	1	1	1	5	33	3	115	10	105	70	75	145	86	0	8	2	45	58.575	96.25	97.75
73	19	1	3	1	3	3	4	18	6	120	5	115	80	70	150	99	0	7	2	45.25	59.825	96	96.5
