# Supplementary material for: Treatment of the terrible triad of the elbow by olecranon osteotomy: a retrospective cohort study
Source: PeerJ. 2024 Nov 15;12:e18469. doi: 10.7717/peerj.18469 (PMC11572344; doi:10.7717/peerj.18469)
Supplement: Supplemental Information 2 [file peerj-12-18469-s002.xlsx]

## Sheet: Sheet1
Variable	Definition
Sex	male=1, female=0
Causes of injury	Car accident=1, Fall down=2, Fall from height=3
Left or right side	Left=1, Right=2
Mason	I=1, II=2, III=3
Morrey	I=1, II=2, III=3
Complications	Complications occurred=1, No complications=0
